# Supplementary material for: Integron-mediated Multidrug Resistance in a Global Collection of Nontyphoidal Salmonella enterica Isolates
Source: PubMed Central journal article supplement (PMC2666292; doi:10.3201/eid1503.081131), 2009-03
Supplement: 08-1131_appT-s1.pdf [file 08-1131_appT-s1.pdf]

Appendix Table. Description of integrons and associated serotypes, MLST results, and countries of origin of 90 isolates with the ACSSuT phenotype used in this study\*

| Integron profile†                                | No. isolates<br>(no. with integrons<br>sequenced) | Serotype       | MLST results |             |             |             |             |             |             | ST (no.<br>isolates) | Country            |              |
|--------------------------------------------------|---------------------------------------------------|----------------|--------------|-------------|-------------|-------------|-------------|-------------|-------------|----------------------|--------------------|--------------|
|                                                  |                                                   |                | <i>aroC</i>  | <i>dnaN</i> | <i>hemD</i> | <i>hisD</i> | <i>sucA</i> | <i>purE</i> | <i>thrA</i> |                      |                    |              |
| <i>aacA4</i>                                     | 1 (1)                                             | Isangi         | 117          | 73          | 41          | 79          | 71          | 65          | 72          | 335 (1)              | South Africa       |              |
|                                                  | 1 (1)                                             | Isangi         | 117          | 73          | 41          | 79          | 71          | 65          | 72          | 335 (1)              | Uganda             |              |
|                                                  | 1 (1)                                             | Typhimurium    | 10           | 7           | 12          | 9           | 5           | 9           | 2           | 19 (1)               | South Africa       |              |
| <i>aac(6')-IIc/ereA2/IS1247/aac/arr/ereA2</i>    | 3 (2)                                             | Heidelberg     | 2            | 7           | 9           | 9           | 5           | 9           | 12          | 15 (3)               | Philippines        |              |
| <i>aadA2</i>                                     | 1 (1)                                             | Isangi         | 2            | 73          | 41          | 79          | 71          | 65          | 72          | 216 (1)              | South Africa       |              |
| <i>arr2/cmlA5/blaOXA10/aadA1</i>                 | 8 (5)                                             | Isangi         | 2            | 73          | 41          | 79          | 71          | 65          | 72          | 216 (5)              | South Africa       |              |
|                                                  |                                                   |                | 117          | 73          | 41          | 79          | 71          | 65          | 72          | 335 (1)              |                    |              |
|                                                  |                                                   |                | 10           | 73          | 41          | 79          | 71          | 9           | 72          | 336 (1)              |                    |              |
|                                                  | 3 (1)                                             | Typhimurium    | 2            | 73          | 41          | 79          | 71          | 65          | 8           | 337 (1)              |                    |              |
|                                                  |                                                   |                | 10           | 7           | 12          | 9           | 5           | 9           | 2           | 19 (3)               |                    |              |
| <i>blaOXA30/aadA1</i>                            | 1 (1)                                             | Typhimurium    | 116          | 7           | 12          | 9           | 5           | 9           | 2           | 328 (1)              | Taiwan             |              |
| <i>dfrA1/aadA1</i>                               | 1 (1)                                             | Goettingen     | 11           | 10          | 13          | 32          | 10          | 13          | 112         | 334 (1)              | Spain              |              |
|                                                  | 2 (2)                                             | Brandenburg    | 11           | 10          | 13          | 32          | 10          | 13          | 112         | 334 (2)              |                    |              |
|                                                  | 1 (1)                                             | Typhimurium    | 10           | 19          | 12          | 9           | 5           | 9           | 2           | 34 (1)               | Germany            |              |
|                                                  | 5 (5)                                             | Cholerasuis    | 34           | 31          | 35          | 14          | 26          | 6           | 8           | 66 (4)               | Taiwan             |              |
| <i>dfrA12/orfF/aadA2</i>                         | 1 (1)                                             | Stanley        | 16           | 16          | 20          | 18          | 8           | 12          | 18          | 29 (1)               |                    |              |
|                                                  |                                                   |                | 16           | 16          | 20          | 18          | 8           | 12          | 18          | 29 (1)               |                    |              |
|                                                  | 1 (1)                                             | Schwarzengrund | 43           | 47          | 49          | 49          | 41          | 15          | 3           | 96 (1)               |                    |              |
|                                                  | 1 (1)                                             | Schwarzengrund | 43           | 47          | 49          | 49          | 41          | 15          | 3           | 96 (1)               | Denmark            |              |
|                                                  | 1 (1)                                             | Typhimurium    | 10           | 7           | 12          | 9           | 5           | 9           | 2           | 19 (1)               | United States/CDC  |              |
|                                                  | 1 (1)                                             | Heidelberg     | 2            | 7           | 9           | 9           | 5           | 9           | 12          | 15 (1)               | Philippines        |              |
|                                                  | 2 (2)                                             | Typhimurium    | 10           | 7           | 12          | 9           | 5           | 9           | 2           | 19 (2)               | South Africa       |              |
|                                                  | <i>dfrA7</i>                                      | 6 (5)          | Enteritidis  | 5           | 2           | 3           | 7           | 6           | 6           | 11                   | 11 (6)             | Uganda       |
|                                                  |                                                   | 2 (2)          | Enteritidis  | 5           | 2           | 3           | 7           | 6           | 6           | 11                   | 11 (2)             | South Africa |
| 4 (2)                                            |                                                   | Paratyphi A    | 45           | 4           | 8           | 44          | 27          | 9           | 8           | 85 (4)               | Denmark            |              |
| <i>qacH/dfrA17/ereA/aadA2/cmlA/aadA1</i>         | 13 (3)                                            | Stanley        | 16           | 16          | 20          | 18          | 8           | 12          | 18          | 29 (13)              | Taiwan             |              |
| <i>tnpA/dfrA7</i>                                | 1 (1)                                             | Enteritidis    | 5            | 2           | 3           | 7           | 6           | 6           | 11          | 11 (1)               | Uganda             |              |
| <i>aacA4, arr2/cmlA5/blaOXA10/aadA1</i>          | 6 (3)‡                                            | Typhimurium    | 10           | 7           | 12          | 9           | 5           | 9           | 2           | 19 (6)               | South Africa       |              |
| <i>aadA2, blaOXA30/aadA1</i>                     | 1 (1)                                             | Typhimurium    | 10           | 7           | 12          | 9           | 112         | 9           | 2           | 313 (1)              | South Africa       |              |
| <i>aadB, blaOXA30/aadA1</i>                      | 1 (1)                                             | Typhimurium    | 10           | 7           | 12          | 9           | 112         | 9           | 2           | 313 (1)              | South Africa       |              |
| <i>aadB/catB3, blaOXA30/aadA1</i>                | 1 (1)                                             | Typhimurium    | 10           | 7           | 12          | 9           | 5           | 9           | 2           | 19 (1)               | Taiwan             |              |
|                                                  | 1 (1)                                             | Typhimurium    | 116          | 7           | 12          | 9           | 5           | 9           | 2           | 328 (1)              | Philippines        |              |
|                                                  | 4 (4)                                             | Typhimurium§   | 10           | 7           | 12          | 9           | 5           | 9           | 2           | 19 (4)               | United States/ACHD |              |
| <i>blaPSE1, aadA2</i>                            | 2 (2)                                             | Typhimurium§   | 10           | 7           | 12          | 9           | 5           | 9           | 2           | 19 (2)               | Spain              |              |
|                                                  | 3 (3)                                             | Typhimurium§   | 10           | 7           | 12          | 9           | 5           | 9           | 2           | 19 (3)               | Italy              |              |
|                                                  | 3 (3)                                             | Typhimurium§   | 10           | 7           | 12          | 9           | 5           | 9           | 2           | 19 (3)               | South Africa       |              |
|                                                  | 4 (4)                                             | Albany§        | 104          | 100         | 54          | 78          | 104         | 9           | 48          | 292 (4)              | Taiwan             |              |
| <i>dfrA1/orfC, blaPSE1</i>                       | 1 (1)                                             | Newport        | 63           | 14          | 6           | 12          | 5           | 14          | 58          | 156 (1)              | Denmark            |              |
| <i>dfrA15, blaPSE1, aac3A-Id/aadA7</i>           | 1 (1)                                             | Typhimurium    | 10           | 7           | 12          | 9           | 112         | 9           | 2           | 313 (1)              | South Africa       |              |
| <i>aadB, aadA2, blaOXA30/aadA1</i>               | 1 (1)                                             | Typhimurium    | 10           | 7           | 12          | 9           | 112         | 9           | 2           | 313 (1)              | South Africa       |              |
| <i>dfrA15, blaPSE1, aadA2, dfrA12/orfF/aadA2</i> | 1 (1)                                             | Typhimurium§   | 10           | 7           | 12          | 9           | 5           | 9           | 2           | 19 (1)               | United States/ACHD |              |

\*ACSSuT, ampicillin, chloramphenicol, streptomycin, sulfamethoxazole, and tetracycline; MLST, multilocus sequence typing; ST, sequence type; CDC, Centers for Disease Control and Prevention; ACHD, Allegheny County Health Department.

†Order of gene cassettes is as listed.

‡3 *aacA4* cassettes were fully sequenced; *arr2/cmlA5/blaOXA10/aadA1* gene cassettes were identified by partial sequencing and PCR with multiple primer pairs internal to gene cassettes.

§Positive for SGI1 or variant SGI1.
